# Supplementary material
Source: PubMed Central journal article supplement (PMC2730597)

## Supplemental Data

**Figure S1.** List of potential candidate genes in the mapped H-2D region of chromosome 17. The black bars to the left of the map are segments of the H-2D interval with scale indicating positions in megabases (Mb). Mouse gene names and symbols as well as the corresponding human gene symbols from syntenic human chromosome 6p21.3 are listed on the right side. The H-2D region was annotated according to the Ensembl Genome database (<http://www.ensembl.org>).

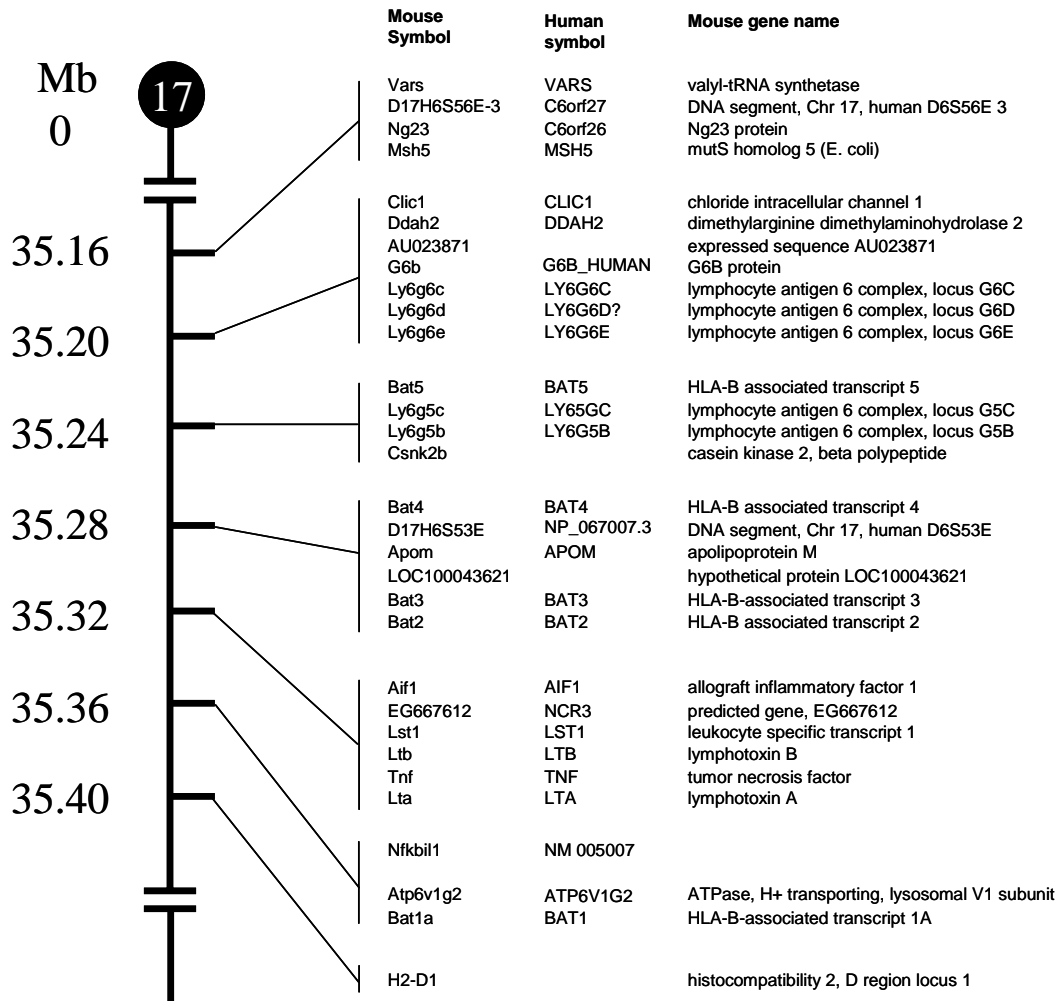

**Figure S2.** Congenic mice R2 (A) and R7 (B) with at least one NKC<sup>mamy</sup> haplotype were infected with a range of MCMV doses as indicated and splenocytes were analyzed by flow cytometry at 90h post-infection. A. Percentages (upper graph) and numbers (lower graph) of Ly49G2+ NK cells (gated NK1.1+ CD3-) from uninfected or infected R2 mice are shown. B. Percentages (upper graph) and numbers (lower graph) of G2+ (black) or G2- (grey) NK cells (gated NK1.1+ CD3-) from uninfected or infected R7 mice are shown. \* P<0.05, \*\* P<0.01. NS, not significant. Statistical analysis was performed with Student's T-test.

**A.**

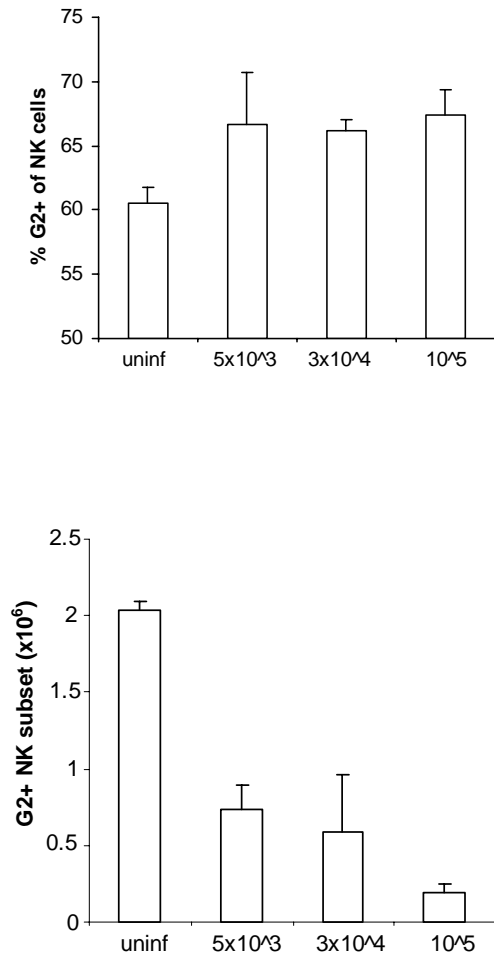

**B.**

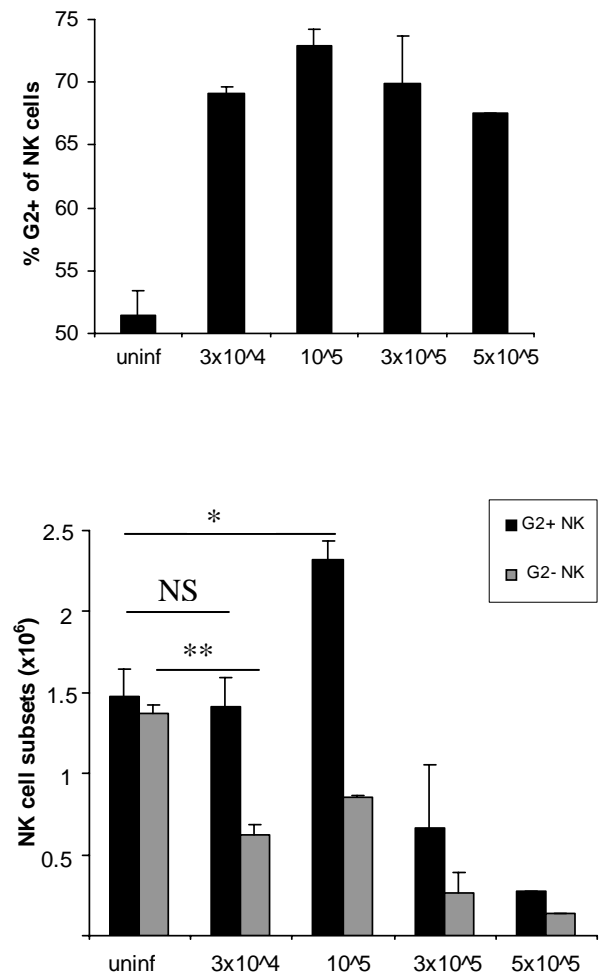

**Figure S3.** Splenocytes were harvested from uninfected 129 and congenic mice R2 and R7 with the homozygous  $NKC^{mamy}$  haplotype and cultured in IL-2 media for 5 days. Adherent cells (lymphokine activated killer cells) were stained and analyzed by flow cytometry. Purity of NK cells was 70-95% as determined by gating (DX5+CD3-CD19- for 129 mice and NK1.1+CD3-CD19- for  $NKC^{mamy}$  mice). Representative dot plots are shown.

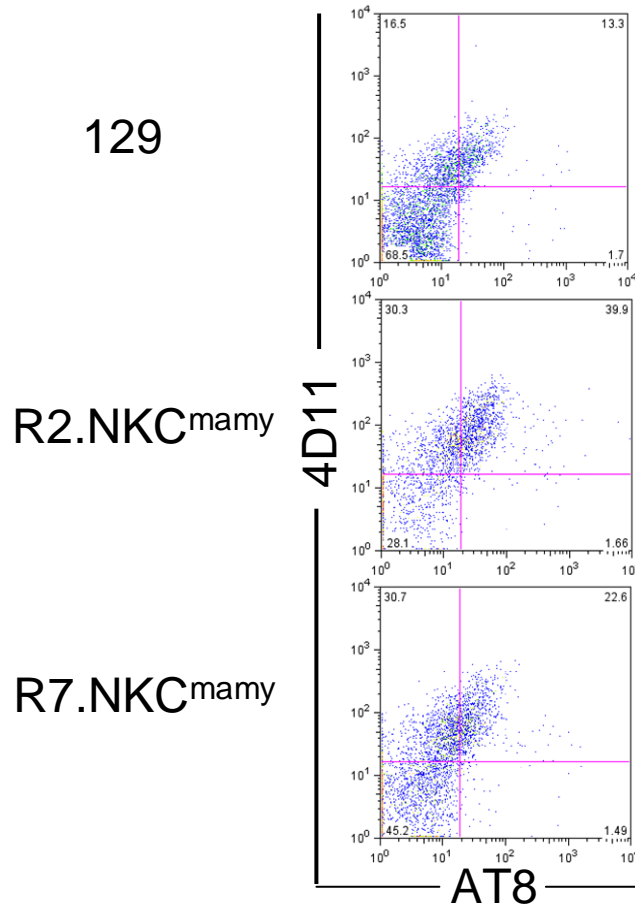

Supplement: NIHMS119339-supplement-Suppl__Data.pdf [file NIHMS119339-supplement-Suppl__Data.pdf]
